# Supplementary material
Source: Springer Nature journal article supplement (https://www.springermedizin.de/resource/supplementary/12902_2009_87_MOESM2_ESM.pdf/9515506)

Functional relationship with T2DM

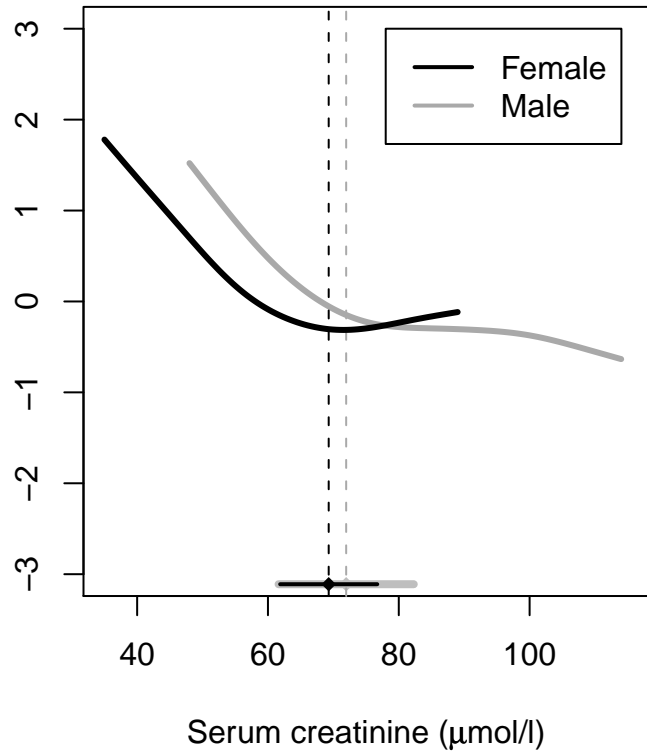

Odds ratio

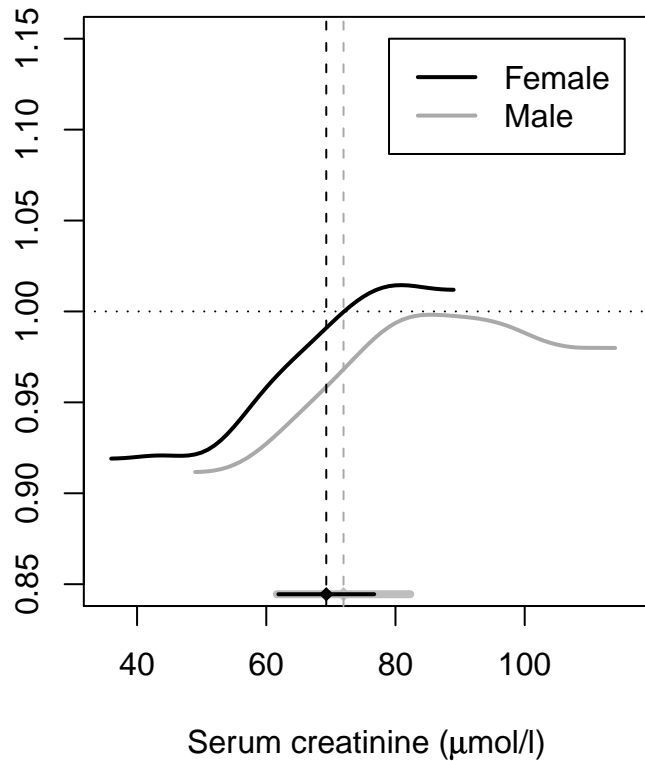

Supplement: MOESM2 [file 9515506]
